# Supplementary material
Source: publisher site journal article supplement (https://static.cambridge.org/content/id/urn:cambridge.org:id:article:S1751731120001676/resource/name/S1751731120001676supp001.docx)
Supplement: Supplementary file 1 [file S1751731120001676supp001.docx]

Video Supplementary material

**A machine vision system to detect and count laying hens in battery cages**

Odded Geffen1,2,3, Yitzhak Yitzhaky2, Nati Barchilon1,3, Shelly Druyan3, Ilan Halachmi1*

1 Precision livestock farming (PLF) Lab., Institute of Agricultural Engineering, Agricultural Research Organization (A.R.O.) - The Volcani Center, Derech Hamaccabim, Rishon Lezion, Israel

2 Electro Optical Engineering Dept., School of Electrical and Computer Engineering, Ben-Gurion University of the Negev, Ben Gurion Avenue, Be'er Sheva, Israel

3 Animal Science Institute, Agricultural Research Organization (A.R.O.) - The Volcani Center, Derch Hamaccabim, Rishon Lezion, Israel

Animal journal.

**Short video - Hens were detected, tracked and assigned with identifications (IDs) in a video sequence comprised of successive frames. A green bounding box represents a hen that was detected in the current frame, a blue box represents a hen that was detected at least once but was not detected in the current frame. The # sign presents a hen's ID, and the number after the ID (#ID_number) reflects the number of frames in a row in which a hen was not detected. After the last frame, the number of hens in the cage can be derived from the hens' IDs.**
